# Supplementary material for: Sea-ice evaluation of NEMO-Nordic 1.0: a NEMO–LIM3.6-based ocean–sea-ice model setup for the North Sea and Baltic Sea
Source: Copernicus journal article supplement (doi:10.5194/gmd-10-3105-2017), 2017-08-22
Supplement: Supplementary file 1 [file gmd-10-3105-2017-supplement.zip]

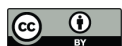

## *Supplement of*

# **Sea-ice evaluation of NEMO-Nordic 1.0: a NEMO-LIM3.6-based ocean–sea-ice model setup for the North Sea and Baltic Sea**

**Per Pemberton et al.**

*Correspondence to:* Per Pemberton ([per.pemberton@smhi.se](mailto:per.pemberton@smhi.se))

- [gmd-10-3105-2017-supplement-title-page.pdf](#)
- [iceextent\\_MBI\\_1961-2006.gif](#)
- [supplement\\_NEMONordic\\_codechanges.pdf](#)

The copyright of individual parts of the supplement might differ from the CC BY 3.0 License.
